# Supplementary material for: Adenovirus-vectored African Swine Fever Virus Antigens Cocktail Is Not Protective against Virulent Arm07 Isolate in Eurasian Wild Boar
Source: MDPI journal article supplement (doi:10.3390/pathogens9030171), 2020-02-28
Supplement: s1 [file s1]

Supplementary Material

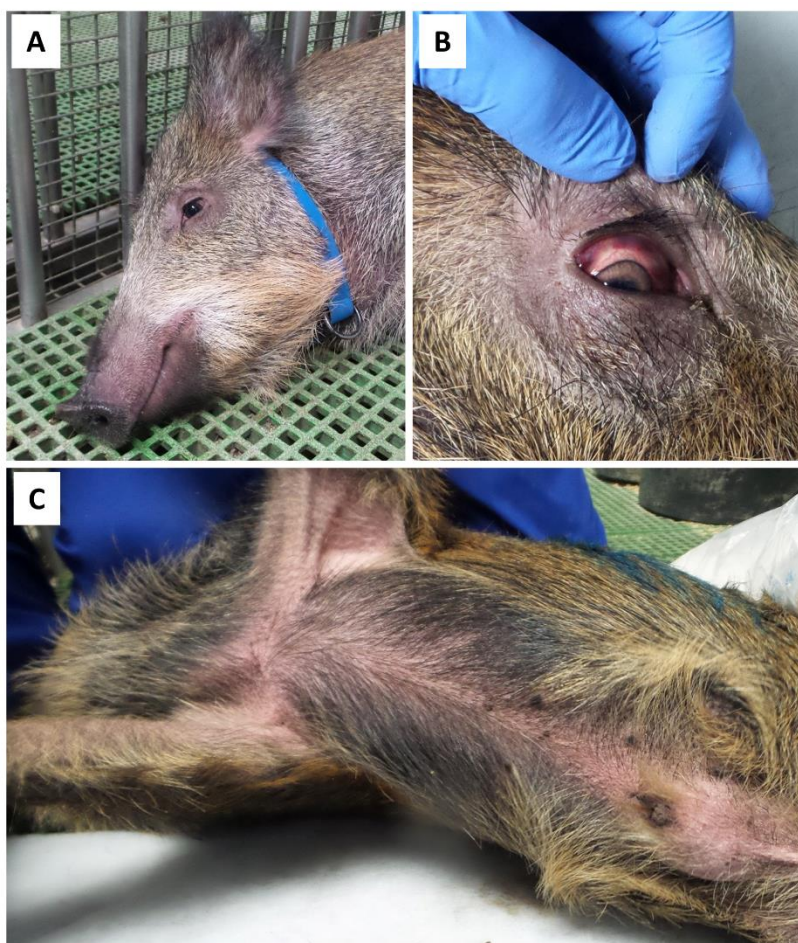

**Figure S1.** Clinical signs related to skin alterations parameters for clinical scoring in wild boar: (A) localized erythema in ears, eye region and snout, (B) intense ocular congestion and (C) generalized erythema (ventral abdomen).

**Table S1:** Models fitted to evaluate the ASFV DNA levels in tissues. The best-fitting model is remarked in a square, with the lowest Akaike information criteria (AIC) and Bayesian information criterion (BIC). Marginal ( $R^2M$ ) and conditional ( $R^2C$ ) squared R are given for each model.

|                                                                                                                                                                       | AIC  | BIC  | $R^2M$ | $R^2C$ |
|-----------------------------------------------------------------------------------------------------------------------------------------------------------------------|------|------|--------|--------|
| CT value from tissue ~ Tissues + Clinical score + ELISA test + Days of viremia + CT value from last viremia + Temperature + Group of treatment + Survival time (days) | 1112 | 1171 | 0.36   | 0.56   |
| CT value from tissue ~ Tissues + Clinical score + ELISA test + Days of viremia + CT value from last viremia + Temperature + Group of treatment                        | 1110 | 1165 | 0.37   | 0.54   |
| CT value from tissue ~ Tissues + Clinical score + ELISA test + Days of viremia + CT value from last viremia + Temperature                                             | 1108 | 1160 | 0.38   | 0.53   |
| CT value from tissue ~ Tissues + Clinical score + ELISA test + Days of viremia + CT value from last viremia                                                           | 1108 | 1156 | 0.38   | 0.52   |
| CT value from tissue ~ Tissues + Clinical score + ELISA test + Days of viremia                                                                                        | 1107 | 1151 | 0.39   | 0.51   |
| CT value from tissue ~ Tissues + Clinical score + ELISA test                                                                                                          | 1113 | 1154 | 0.37   | 0.51   |
| CT value from tissue ~ Tissues + Clinical score                                                                                                                       | 1122 | 1159 | 0.53   | 0.50   |
| CT value from tissue ~ Tissues                                                                                                                                        | 1118 | 1152 | 0.24   | 0.50   |

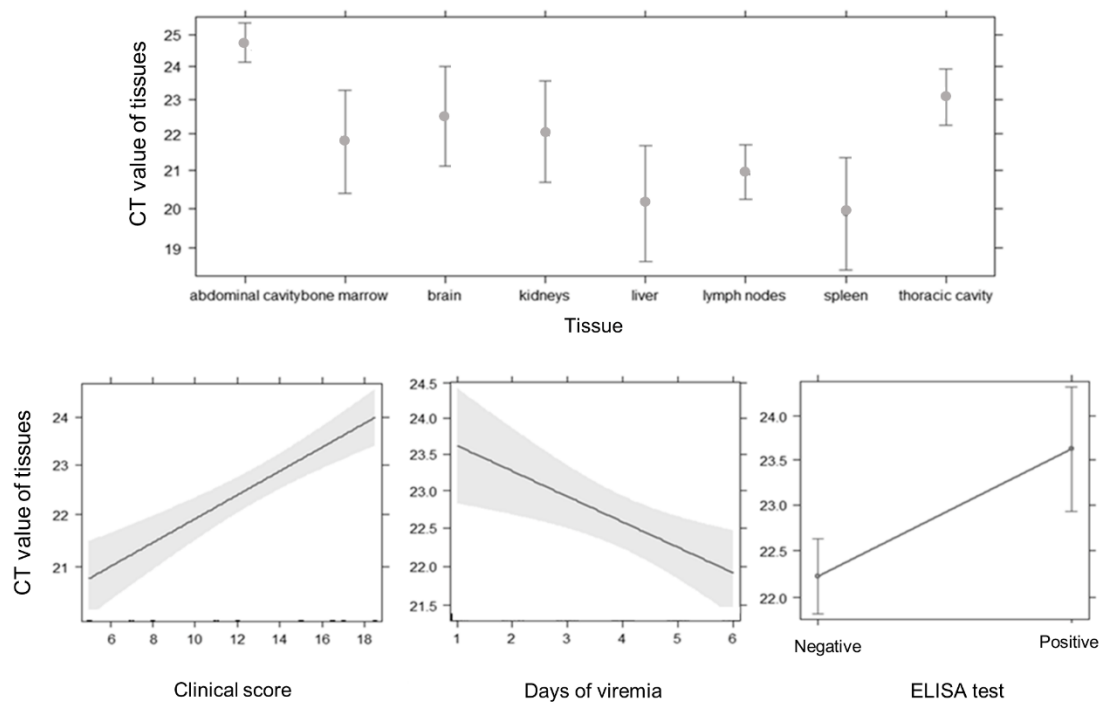

**Figure S2.** The predictor effects obtained from the best-fitting mixed model to explain the ASFV DNA levels in tissues. Shaded areas represent the standard error of predictor effects values.
